# Supplementary material
Source: PubMed Central journal article supplement (PMC7439270)
Supplement: ao0c00703_si_001.pdf [file ao0c00703_si_001.pdf]

## SUPPORTING INFORMATION

### ***Pseudomonas aeruginosa* Presents Multiple Vital Changes in its Proteome in the Presence of 3-Hydroxyphenylacetic acid, a Promising Antimicrobial Agent**

**Author List:** Ozgun O. Ozdemir, Ferda Soyer\*

**Affiliation:** Department of Molecular Biology and Genetics, Izmir Institute of Technology,  
35430 Urla Izmir, Turkey

**\*Corresponding author:** Ferda Soyer (ORCID: 0000-0001-8307-1258)

ferdasoyer@iyte.edu.tr

## Supporting Information 1

Table S1. The undetected DNA-related proteins after 3-HPAA exposure

| <b>Protein ID</b>    | <b>Protein Name</b>                            | <b>Gene Name</b> | <b>Function</b>                           |
|----------------------|------------------------------------------------|------------------|-------------------------------------------|
| <b><u>Q9HUU8</u></b> | DNA topoisomerase 4 subunit B                  | parE PA4967      | DNA topological change                    |
| <b><u>Q9HT76</u></b> | Vitamin B12-dependent ribonucleotide reductase | nrdJa PA5497     | DNA biosynthetic process, DNA replication |
| <b><u>Q9HWG0</u></b> | UvrABC system protein A                        | uvrA PA4234      | Nucleotide excision repair, SOS response  |
| <b><u>Q9HY08</u></b> | DNA mismatch repair protein MutS               | mutS PA3620      | Mismatch repair                           |
| <b><u>Q914Y3</u></b> | Uncharacterized protein                        | PA0986           | Transposase activity, transposition       |

Table S2. The newly detected DNA-related proteins after 3-HPAA exposure

| <b>Protein ID</b>    | <b>Protein Name</b>                   | <b>Gene Name</b> | <b>Function</b>                                                                                                     |
|----------------------|---------------------------------------|------------------|---------------------------------------------------------------------------------------------------------------------|
| <b><u>Q910T9</u></b> | Exodeoxyribonuclease III              | xthA PA2545      | Endonuclease activity, DNA repair                                                                                   |
| <b><u>Q9HXZ1</u></b> | DNA polymerase III subunit alpha      | dnaE PA3640      | DNA replication                                                                                                     |
| <b><u>Q9HYX7</u></b> | Recombination-associated protein RdgC | rdgC PA3263      | DNA recombination                                                                                                   |
| <b><u>Q917C4</u></b> | Beta sliding clamp                    | dnaN PA0002      | DNA strand elongation involved in DNA replication, 3'-5' exonuclease activity, DNA-directed DNA polymerase activity |
| <b><u>P40947</u></b> | Single-stranded DNA-binding protein   | ssb PA4232       | DNA recombination, DNA repair, DNA replication                                                                      |

Table S3. The undetected RNA-related proteins after 3-HPAA exposure

| <b>Protein ID</b>    | <b>Protein Name</b>                                 | <b>Gene Name</b> | <b>Function</b>                                                                                                |
|----------------------|-----------------------------------------------------|------------------|----------------------------------------------------------------------------------------------------------------|
| <b><u>P49988</u></b> | RNA polymerase sigma-54 factor                      | rpoN PA4462      | Transcription initiation, sigma factor activity                                                                |
| <b><u>Q9HVV7</u></b> | Stringent starvation protein A                      | sspA PA4428      | RNA-polymerase core enzyme binding                                                                             |
| <b><u>Q9X6W6</u></b> | Bifunctional protein PyrR                           | pyrR PA0403      | Nucleoside metabolic process, regulation of transcription                                                      |
| <b><u>Q910Q4</u></b> | RNA chaperone ProQ                                  | PA2582           | RNA strand exchange activity, RNA strand annealing activity, posttranscriptional regulation of gene expression |
| <b><u>Q9I200</u></b> | Probable transcriptional regulator                  | PA2115           | Transcription                                                                                                  |
| <b><u>Q9HZ15</u></b> | Probable transcriptional regulator                  | PA3225           | Transcription                                                                                                  |
| <b><u>Q9I382</u></b> | tRNA 2-selenouridine/geranyl-2-thiouridine synthase | selU PA1643      | tRNA seleno modification                                                                                       |

|                      |                                            |             |                                                                                    |
|----------------------|--------------------------------------------|-------------|------------------------------------------------------------------------------------|
| <b><u>Q9HY82</u></b> | Ribonuclease T                             | rnt PA3528  | tRNA 3'-end processing                                                             |
| <b><u>Q9HU78</u></b> | Histidine utilization repressor            | hutC PA5105 | Negative regulation of transcription, histidine catabolic process                  |
| <b><u>Q9HU59</u></b> | DNA-binding transcriptional regulator NtrC | ntrC PA5125 | Nitrogen fixation, regulation of nitrogen utilization, regulation of transcription |
| <b><u>Q9HWX1</u></b> | Transcriptional repressor NrdR             | nrdR PA4057 | Transcription, negative regulation of oxidoreductase activity,                     |
| <b><u>Q03456</u></b> | Ferric uptake regulation protein           | fur PA4764  | Negative regulation of transcription                                               |

Table S4. The newly detected RNA-related proteins after 3-HPAA exposure

| <b><u>Protein ID</u></b> | <b><u>Protein Name</u></b>                                | <b><u>Gene Name</u></b> | <b><u>Function</u></b>                                                                                                                                                                                                               |
|--------------------------|-----------------------------------------------------------|-------------------------|--------------------------------------------------------------------------------------------------------------------------------------------------------------------------------------------------------------------------------------|
| <b><u>P95459</u></b>     | Major cold shock protein CspA                             | cspA PA3266             | Regulation of transcription                                                                                                                                                                                                          |
| <b><u>Q916T1</u></b>     | Probable transcriptional regulator                        | PA0207                  | Transcription, DNA binding transcription factor activity                                                                                                                                                                             |
| <b><u>P23620</u></b>     | Phosphate regulon transcriptional regulatory protein PhoB | phoB PA5360             | Flagellum-dependent swarming motility, phosphate ion transport positive regulation of cellular response to phosphate starvation, transcription                                                                                       |
| <b><u>Q9HTL0</u></b>     | DNA-binding protein HU-alpha                              | hupA PA5348             | Chromosome condensation, regulation of nucleic acid templated transcription                                                                                                                                                          |
| <b><u>Q9HTL4</u></b>     | OxyR                                                      | oxyR PA5344             | RNA polymerase transcription activator, transcription regulatory region DNA binding source, negative regulation of secondary metabolite biosynthetic process, cell motility, lipid biosynthesis, response to reactive oxygen species |
| <b><u>Q9HYT6</u></b>     | RNA polymerase-associated protein RapA                    | rapA hepA, PA3308       | Transcription, Helicase activity                                                                                                                                                                                                     |
| <b><u>G3XD14</u></b>     | RNA polymerase-binding transcription factor DksA          | dksA PA4723             | RNA polymerase binding, negative regulation of rRNA expression and positive regulation of several amino acid biosynthesis promoters                                                                                                  |
| <b><u>P26480</u></b>     | RNA polymerase sigma factor RpoD                          | rpoD rpoDA, PA0576      | DNA binding transcription factor activity, sigma factor activity, transcription initiation                                                                                                                                           |

Table S5. The undetected ribosome and protein-related proteins after 3-HPAA exposure

| <b><u>Protein ID</u></b> | <b><u>Protein Name</u></b>                      | <b><u>Gene Name</u></b> | <b><u>Function</u></b>                                                 |
|--------------------------|-------------------------------------------------|-------------------------|------------------------------------------------------------------------|
| <b><u>P65116</u></b>     | Translation initiation factor IF-1              | infA PA2619             | Ribosome binding, rRNA binding, translation initiation factor activity |
| <b><u>Q9HVT9</u></b>     | Glutamyl-tRNA(Gln) amidotransferase subunit C   | gatC PA4482             | Regulation of translational fidelity, translation                      |
| <b><u>Q9HUM0</u></b>     | RNA-binding protein Hfq                         | hfq PA4944              | mRNA translational regulation                                          |
| <b><u>Q9HUL3</u></b>     | Small ribosomal subunit biogenesis GTPase RsgA  | rsgA PA4952             | Ribosome biogenesis                                                    |
| <b><u>Q9HV58</u></b>     | 30S ribosomal protein S15                       | rpsO PA4741             | ribosome constituent, translation                                      |
| <b><u>Q9HT10</u></b>     | Ribosomal RNA small subunit methyltransferase G | rsmG PA5564             | rRNA (guanine-N7)-methylation                                          |

|                      |                                                  |                   |                                                                                                 |
|----------------------|--------------------------------------------------|-------------------|-------------------------------------------------------------------------------------------------|
| <b><u>Q9I003</u></b> | ATP-dependent RNA helicase DeaD                  | deaD PA2840       | ribosomal large subunit assembly, RNA catabolic process, RNA secondary structure unwinding      |
| <b><u>Q9HUF0</u></b> | Ribosomal RNA large subunit methyltransferase J  | rlmJ PA5019       | rRNA base methylation                                                                           |
| <b><u>Q9I2U8</u></b> | Glutamine--tRNA ligase                           | glnS PA1794       | Glutamine--tRNA ligase activity                                                                 |
| <b><u>Q9I2U7</u></b> | Cysteine--tRNA ligase                            | cysS PA1795       | Cysteine--tRNA ligase activity                                                                  |
| <b><u>Q9I4R2</u></b> | Uncharacterized protein                          | PA1062            | Protein acetylation                                                                             |
| <b><u>Q9HVB7</u></b> | Ribosomal-protein-alanine acetyltransferase      | rimI PA4678       | N-terminal protein amino acid acetylation                                                       |
| <b><u>Q9I2T8</u></b> | Peptidylprolyl isomerase                         | ppiD PA1805       | peptidyl-prolyl cis-trans isomerase activity                                                    |
| <b><u>Q9HT12</u></b> | Chromosome partitioning protein Spo0J            | spoOJ PA5562      | Identical protein binding, protein homopolymerization                                           |
| <b><u>Q9HU56</u></b> | Protein-export protein SecB                      | secB PA5128       | Protein tetramerization, protein transport                                                      |
| <b><u>O68822</u></b> | Cytosol aminopeptidase                           | pepA phpA, PA3831 | Release of an N-terminal amino acid, processing and regular turnover of intracellular proteins. |
| <b><u>Q9HU38</u></b> | Uncharacterized protein                          | PA5146            | Regulation of protein targeting to membrane                                                     |
| <b><u>Q9HXZ0</u></b> | Probable amino acid permease                     | PA3641            | Alanine:sodium symporter activity                                                               |
| <b><u>Q9HYR9</u></b> | ATP-dependent Clp protease proteolytic subunit 2 | clpP2 PA3326      | Endopeptidase activity                                                                          |
| <b><u>Q9HVT2</u></b> | Alpha-2-macroglobulin homolog                    | PA4489            | Endopeptidase inhibitor activity                                                                |
| <b><u>Q9HUM2</u></b> | Protein HflK                                     | hflK PA4942       | Peptidase activity                                                                              |
| <b><u>Q9HZC5</u></b> | Aminopeptidase N                                 | pepN PA3083       | Peptide catabolic process, proteolysis                                                          |

Table S6. The newly detected ribosome and protein-related proteins after 3-HPAA exposure

| <b>Protein ID</b>    | <b>Protein Name</b>                               | <b>Gene Name</b> | <b>Function</b>                                                                                                      |
|----------------------|---------------------------------------------------|------------------|----------------------------------------------------------------------------------------------------------------------|
| <b><u>Q9HYC7</u></b> | Methionine--tRNA ligase                           | metG PA3482      | Elongation of protein synthesis and initiation of all mRNA translation through initiator tRNA (fMet) aminoacylation. |
| <b><u>Q9XC6</u></b>  | Glutamate--tRNA ligase                            | gltX PA3134      | Glutamate-tRNA ligase activity                                                                                       |
| <b><u>Q9I5Q3</u></b> | Tyrosine--tRNA ligase 2                           | tyrS2 PA0668     | Tyrosine-tRNA ligase activity                                                                                        |
| <b><u>Q9HVM4</u></b> | Isoleucine--tRNA ligase                           | ileS PA4560      | Isoleucine--tRNA ligase activity                                                                                     |
| <b><u>Q9I0A4</u></b> | Phenylalanine--tRNA ligase beta subunit           | pheT PA2739      | Phenylalanine--tRNA ligase activity                                                                                  |
| <b><u>Q9HZI7</u></b> | Probable ATP-binding component of ABC transporter | PA3019           | Valine-tRNA ligase activity, ATPase activity                                                                         |
| <b><u>Q9HUA3</u></b> | Proline iminopeptidase                            | PA5080           | Aminopeptidase activity                                                                                              |
| <b><u>Q9HXJ8</u></b> | GTPase Der                                        | der engA, PA3799 | GTP binding, ribosome biogenesis                                                                                     |
| <b><u>Q9HUN0</u></b> | 30S ribosomal protein S18                         | rpsR PA4934      | Structural constituent of ribosome, translation                                                                      |
| <b><u>G3XD74</u></b> | D-ala-D-ala-carboxypeptidase                      | dacC PA3999      | Carboxypeptidase activity                                                                                            |

Table S7. The undetected cell wall and membrane-related proteins after 3-HPAA exposure

| <b>Protein ID</b>    | <b>Protein Name</b>                                                                     | <b>Gene Name</b> | <b>Function</b>                                                                                                                       |
|----------------------|-----------------------------------------------------------------------------------------|------------------|---------------------------------------------------------------------------------------------------------------------------------------|
| <b><u>Q9HT06</u></b> | Membrane protein insertase YidC                                                         | yidC PA5568      | Membrane insertase activity, insertion and/or proper folding and/or complex formation of integral membrane proteins into the membrane |
| <b><u>Q9I6C1</u></b> | Signal recognition particle receptor FtsY                                               | ftsY PA0373      | Cotranslational protein targeting to membrane                                                                                         |
| <b><u>Q9I157</u></b> | PvdL                                                                                    | pvdL PA2424      | Pyoverdine biosynthetic process                                                                                                       |
| <b><u>Q9HVM8</u></b> | Type IV pilus biogenesis factor PilY1                                                   | pilY1 PA4554     | Type IV-pilus dependent motility                                                                                                      |
| <b><u>P34750</u></b> | Fimbrial assembly protein PilQ                                                          | pilQ PA5040      | Type IV-pilus biogenesis                                                                                                              |
| <b><u>G3XD28</u></b> | Type 4 fimbrial biogenesis protein PilM                                                 | pilM PA5044      | Type IV pilus biogenesis, cell cycle,                                                                                                 |
| <b><u>P50598</u></b> | Tol-Pal system protein TolQ                                                             | tolQ PA0969      | Cell cycle, cell division, bacteriocin transport                                                                                      |
| <b><u>Q9I0Y9</u></b> | Resistance-Nodulation-Cell Division (RND) multidrug efflux membrane fusion protein MexE | mexE PA2493      | Cell division, response to antibiotic                                                                                                 |
| <b><u>Q9HV48</u></b> | ATP-dependent zinc metalloprotease FtsH                                                 | ftsH PA4751      | Cell division, response to antibiotic                                                                                                 |
| <b><u>Q9HVV0</u></b> | Rod shape-determining protein MreB                                                      | mreB PA4481      | Cell morphogenesis                                                                                                                    |
| <b><u>Q9HWC2</u></b> | Uncharacterized protein                                                                 | PA4278           | Peptidoglycan binding                                                                                                                 |
| <b><u>Q51455</u></b> | Chemotaxis protein CheY                                                                 | cheY PA1456      | Flagellum dependent cell motility, chemotaxis, phosphorelay signal transduction system                                                |
| <b><u>Q9I2U1</u></b> | ATP-dependent Clp protease proteolytic subunit 1                                        | clpP1 PA1801     | Flagellum dependent cell motility, single species biofilm formation, response to antibiotic                                           |
| <b><u>Q9I3B3</u></b> | Probable chemotaxis transducer                                                          | PA1608           | Chemotaxis                                                                                                                            |
| <b><u>G3XDA5</u></b> | Anaerobically-induced outer membrane porin OprE                                         | oprE PA0291      | Integral component of membrane                                                                                                        |
| <b><u>Q9I5T4</u></b> | Probable binding protein component of ABC transporter                                   | PA0604           | Membrane transport                                                                                                                    |
| <b><u>Q9I2X2</u></b> | Uncharacterized protein                                                                 | PA1767           | Transmembrane component                                                                                                               |
| <b><u>Q9HUW8</u></b> | Uncharacterized protein                                                                 | PA4842           | Integral component of membrane                                                                                                        |
| <b><u>Q9I3A7</u></b> | Probable lipase                                                                         | PA1615           | Integral component of membrane                                                                                                        |
| <b><u>Q9HXI0</u></b> | Uncharacterized protein                                                                 | PA3822           | Integral component of membrane                                                                                                        |
| <b><u>Q9I2V1</u></b> | Uncharacterized protein                                                                 | PA1791           | Integral component of membrane                                                                                                        |
| <b><u>G3XD11</u></b> | PhoP/Q and low Mg <sup>2+</sup> inducible outer membrane protein H1                     | oprH PA1178      | Integral component of membrane, cell outer membrane                                                                                   |
| <b><u>Q9HV88</u></b> | Heme/hemoglobin uptake outer membrane receptor PhuR                                     | phuR PA4710      | Integral component of membrane, response to iron ion, heme transport                                                                  |
| <b><u>P46384</u></b> | Protein PilG                                                                            | pilG PA0408      | Phosphorelay signal transduction system, pilus biosynthesis and twitching motility                                                    |
| <b><u>Q9I045</u></b> | Probable two-component response regulator                                               | PA2798           | Phosphorelay transduction system                                                                                                      |
| <b><u>Q9HX42</u></b> | Lost Adherence Sensor, LadS                                                             | ladS PA3974      | Phosphorelay sensor kinase activity                                                                                                   |
| <b><u>Q9HUK6</u></b> | FimX                                                                                    | fimX PA4959      | Phosphorelay transduction system                                                                                                      |

Table S8. The newly detected cell wall and membrane-related proteins after 3-HPAA exposure

| <b>Protein ID</b>    | <b>Protein Name</b>                         | <b>Gene Name</b> | <b>Function</b>                                                                        |
|----------------------|---------------------------------------------|------------------|----------------------------------------------------------------------------------------|
| <b><u>Q9HX24</u></b> | Soluble lytic transglycosylase B            | sltB1 PA4001     | Lytic transglycosylase activity                                                        |
| <b><u>Q9HUD4</u></b> | Uncharacterized protein                     | PA5037           | Peptidoglycan binding                                                                  |
| <b><u>Q9HVF6</u></b> | Uncharacterized protein                     | PA4635           | Integral component of membrane                                                         |
| <b><u>P42257</u></b> | Protein PilJ                                | pilJ PA0411      | Chemotaxis, transmembrane signaling receptor activity                                  |
| <b><u>P72151</u></b> | B-type flagellin                            | fliC PA1092      | Flagellum dependent cell motility, Flagellum organization                              |
| <b><u>Q9HU50</u></b> | Probable carboxyl-terminal protease         | PA5134           | Cell envelope organization, cell wall biogenesis, pathogenesis, endopeptidase activity |
| <b><u>G3XDB2</u></b> | Cell division coordinator CpoB              | cpoB PA0974      | FtsZ-dependent cytokinesis                                                             |
| <b><u>Q9HZU7</u></b> | Probable outer membrane protein             | PA2900           | Integral component of membrane, cell outer membrane                                    |
| <b><u>P33641</u></b> | Outer membrane protein assembly factor BamD | bamD PA4545      | Cell envelope organization, protein insertion into membrane                            |

Table S9. The undetected redox and cell homeostasis-related proteins after 3-HPAA exposure

| <b>Protein ID</b>    | <b>Protein Name</b>                      | <b>Gene Name</b> | <b>Function</b>                                                                                                                                                                                                                                                    |
|----------------------|------------------------------------------|------------------|--------------------------------------------------------------------------------------------------------------------------------------------------------------------------------------------------------------------------------------------------------------------|
| <b><u>Q915F9</u></b> | Lon protease                             | lon PA0779       | Response to antibiotic, response to stress, nitric oxide metabolic process, peptidase activity                                                                                                                                                                     |
| <b><u>Q912T9</u></b> | Lon protease                             | lon PA1803       | Response to antibiotics, response to drug, response to stress, pathogenesis, protein quality control for misfolded or incompletely synthesized proteins, single species biofilm formation, type IV pilus dependent motility, flagellum dependent swarming motility |
| <b><u>Q9HZ19</u></b> | Universal stress protein                 | PA3017           | Response to stress                                                                                                                                                                                                                                                 |
| <b><u>Q9I2V3</u></b> | Uncharacterized protein                  | PA1789           | Response to stress                                                                                                                                                                                                                                                 |
| <b><u>Q9HW73</u></b> | Uncharacterized protein                  | PA4328           | Response to stress                                                                                                                                                                                                                                                 |
| <b><u>Q9HUK9</u></b> | Thiosulfate sulfurtransferase            | rhdA PA4956      | Response to toxic substance (Contributes to P. aeruginosa survival under cyanogenic conditions)                                                                                                                                                                    |
| <b><u>Q916Z2</u></b> | Alkyl hydroperoxide reductase subunit F  | ahpF PA0140      | Response to reactive oxygen species                                                                                                                                                                                                                                |
| <b><u>P23189</u></b> | Glutathione reductase                    | gor PA2025       | Cell redox homeostasis, response to oxygen radical                                                                                                                                                                                                                 |
| <b><u>P0C2B2</u></b> | Thiol:disulfide interchange protein DsbA | dsbA PA5489      | Cell redox homeostasis                                                                                                                                                                                                                                             |

|                      |                                              |             |                                                                                |
|----------------------|----------------------------------------------|-------------|--------------------------------------------------------------------------------|
| <b><u>Q9HYY4</u></b> | Probable oxidoreductase                      | PA3256      | Oxidoreductase activity                                                        |
| <b><u>P53652</u></b> | Superoxide dismutase [Mn]                    | sodA PA4468 | Removal of superoxide radicals                                                 |
| <b><u>Q911F8</u></b> | Probable oxidoreductase                      | PA2317      | Oxidoreductase activity                                                        |
| <b><u>Q91067</u></b> | Uncharacterized protein                      | PA2776      | Oxidoreductase activity                                                        |
| <b><u>Q9HVG5</u></b> | Glycerate dehydrogenase                      | hprA PA4626 | Oxidoreductase activity                                                        |
| <b><u>Q910T4</u></b> | Probable acyl-CoA dehydrogenase              | PA2550      | Oxidoreductase activity                                                        |
| <b><u>Q915R7</u></b> | S-adenosylmethionine decarboxylase proenzyme | speD PA0654 | S-adenosylmethioninamine biosynthetic process, spermidine biosynthetic process |

Table S10. The newly detected redox and cell homeostasis-related proteins after 3-HPAA exposure

| <b><u>Protein ID</u></b> | <b><u>Protein Name</u></b>                               | <b><u>Gene Name</u></b> | <b><u>Function</u></b>                                                                       |
|--------------------------|----------------------------------------------------------|-------------------------|----------------------------------------------------------------------------------------------|
| <b><u>Q91578</u></b>     | Probable oxidoreductase                                  | PA0863                  | Oxidoreductase activity                                                                      |
| <b><u>Q910T0</u></b>     | Probable short-chain dehydrogenase                       | PA2554                  | Oxidoreductase activity                                                                      |
| <b><u>Q9HV44</u></b>     | Chaperone protein DnaJ                                   | dnaJ PA4760             | Response to hyperosmotic and heat shock                                                      |
| <b><u>Q912C4</u></b>     | NAD <sup>+</sup> dependent aldehyde dehydrogenase ExaC   | exaC PA1984             | Oxidoreductase activity                                                                      |
| <b><u>Q915A2</u></b>     | Glutathione peroxidase                                   | PA0838                  | Response to oxidative stress                                                                 |
| <b><u>Q9HZZ3</u></b>     | Organic hydroperoxide resistance protein                 | ohr PA2850              | Response to oxidative stress                                                                 |
| <b><u>Q912R2</u></b>     | Probable oxidoreductase                                  | PA1833                  | Oxidoreductase activity                                                                      |
| <b><u>Q9HUF1</u></b>     | Peptide methionine sulfoxide reductase MsrA              | msrA PA5018             | Response to oxidative stress, response to hypochlorite                                       |
| <b><u>Q9HUQ6</u></b>     | Probable short-chain dehydrogenase                       | PA4907                  | Oxidoreductase activity                                                                      |
| <b><u>Q910Z1</u></b>     | Probable oxidoreductase                                  | PA2491                  | Oxidoreductase activity, Negative regulation of secondary metabolite biosynthetic process    |
| <b><u>Q9HWP5</u></b>     | Probable major facilitator superfamily (MFS) transporter | PA4136                  | Drug transmembrane transporter activity                                                      |
| <b><u>Q91619</u></b>     | Spermidine/putrescine import ATP-binding protein PotA    | spuF potA, PA0302       | Spermidine transport, putrescine transport                                                   |
| <b><u>Q9HUX1</u></b>     | Biosynthetic arginine decarboxylase                      | speA PA4839             | Arginine catabolic process, putrescine biosynthetic process, spermidine biosynthetic process |
| <b><u>Q9X6R0</u></b>     | Polyamine aminopropyltransferase 1                       | speE1 speE, PA1687      | Spermidine biosynthetic process                                                              |

Table S11. The undetected metabolism-related proteins after 3-HPAA exposure

| <b>Protein ID</b>    | <b>Protein Name</b>                                                | <b>Gene Name</b> | <b>Function</b>                                                                                          |
|----------------------|--------------------------------------------------------------------|------------------|----------------------------------------------------------------------------------------------------------|
| <b><u>Q9I700</u></b> | Beta-alanine--pyruvate aminotransferase                            | bauA PA0132      | Beta-alanine biosynthetic process                                                                        |
| <b><u>Q9I2S7</u></b> | Lysine-specific pyridoxal 5'-phosphate-dependent carboxylase, LdcA | ldcA PA1818      | Amino acid metabolic process                                                                             |
| <b><u>Q9HTW6</u></b> | Aminopeptidase P                                                   | pepP PA5224      | Aminopeptidase activity                                                                                  |
| <b><u>Q9I4W3</u></b> | 4-hydroxy-tetrahydrodipicolinate synthase                          | dapA PA1010      | Diaminopimelate biosynthetic process, Lysine biosynthetic process                                        |
| <b><u>P19572</u></b> | Diaminopimelate decarboxylase                                      | lysA PA5277      | Lysine biosynthetic process                                                                              |
| <b><u>Q5I375</u></b> | 3-isopropylmalate dehydrogenase                                    | leuB PA3118      | Leucine biosynthetic process                                                                             |
| <b><u>O86428</u></b> | Branched-chain-amino-acid aminotransferase                         | ilvE PA5013      | Leucine biosynthetic process, Isoleucine biosynthetic process, valine biosynthetic process               |
| <b><u>Q9HXI8</u></b> | Cysteine desulfurase IscS                                          | iscS PA3814      | Cysteine desulfurase activity                                                                            |
| <b><u>Q9I583</u></b> | UPF0176 protein PA0858                                             | PA0858           | Cysteine persulfate intermediate                                                                         |
| <b><u>Q9I6A1</u></b> | Cystathionine beta-synthase                                        | PA0399           | Cysteine biosynthetic process                                                                            |
| <b><u>Q9HXE4</u></b> | NAD(P)H-dependent anabolic L-arginine dehydrogenase DauB           | dauB PA3862      | Arginine catabolic process                                                                               |
| <b><u>Q9HZ67</u></b> | Bifunctional chorismate mutase/prephenate dehydratase              | pheA PA3166      | L-phenylalanine biosynthesis, Prephenate biosynthesis                                                    |
| <b><u>Q9HU83</u></b> | Urocanate hydratase                                                | hutU PA5100      | Histidine catabolic process                                                                              |
| <b><u>Q9I2A2</u></b> | Fumarylacetoacetase                                                | fahA PA2008      | Aromatic amino acid family metabolic process                                                             |
| <b><u>P32722</u></b> | Porin D                                                            | oprD PA0958      | Amino acid transport                                                                                     |
| <b><u>Q9HUP4</u></b> | Nicotinate phosphoribosyltransferase 1                             | pncB1 PA4919     | NAD biosynthetic process                                                                                 |
| <b><u>Q9HTK1</u></b> | Probable chorismate pyruvate-lyase                                 | ubiC PA5357      | Ubiquinone biosynthetic process                                                                          |
| <b><u>Q9HTW9</u></b> | Probable FAD-dependent monooxygenase                               | PA5221           | Ubiquinone biosynthetic process                                                                          |
| <b><u>Q9I187</u></b> | Probable dipeptidase                                               | PA2393           | Biyoverdine biosynthetic process                                                                         |
| <b><u>Q5I507</u></b> | Isochorismate pyruvate lyase                                       | pchB PA4230      | Salicylate biosynthetic process                                                                          |
| <b><u>Q9HWG9</u></b> | 5-methylphenazine-1-carboxylate 1-monooxygenase                    | phzS PA4217      | Pyocyanine biosynthetic process                                                                          |
| <b><u>Q9HU21</u></b> | dTDP-4-dehydrorhamnose 3,5-epimerase                               | rmlC PA5164      | Lipopolysaccharide biosynthesis, extracellular polysaccharide biosynthesis, dTDP-L-rhamnose biosynthesis |
| <b><u>Q9I299</u></b> | Methylcrotonyl-CoA carboxylase, alpha-subunit (Biotin-containing)  | liuD PA2012      | isoprenoid catabolic process, leucine catabolic process, terpene catabolic process                       |
| <b><u>Q9I5T1</u></b> | Ribulose-phosphate 3-epimerase                                     | rpe PA0607       | Carbohydrate metabolic process, pentose catabolic process                                                |
| <b><u>Q9I406</u></b> | Glutathione hydrolase proenzyme                                    | ggt PA1338       | Glutathione catabolic process, glutathione biosynthetic process                                          |
| <b><u>Q9HVL5</u></b> | Octaprenyl-diphosphate synthase                                    | ispB PA4569      | Isoprenoid biosynthetic process                                                                          |
| <b><u>Q9I282</u></b> | Uncharacterized protein                                            | PA2033           | Iron assimilation                                                                                        |



|                      |                                                             |                   |                                                                                                      |
|----------------------|-------------------------------------------------------------|-------------------|------------------------------------------------------------------------------------------------------|
| <b><u>Q3XD20</u></b> | Periplasmic serine endoprotease DegP-like                   | mucD PA0766       | Endopeptidase, signal transduction                                                                   |
| <b><u>Q69753</u></b> | Phenazine biosynthesis protein PhzB1                        | phzB1 PA4211      | Phenazine biosynthetic process                                                                       |
| <b><u>Q9HWV5</u></b> | Probable aldehyde dehydrogenase                             | PA4073            | Phenylacetaldehyde dehydrogenase activity                                                            |
| <b><u>Q04633</u></b> | Adenine phosphoribosyltransferase                           | apt PA1543        | Adenine salvage, AMP salvage, purine ribonucleoside salvage                                          |
| <b><u>Q51508</u></b> | Salicylate biosynthesis isochorismate synthase              | pchA PA4231       | pyochelin biosynthetic process, salicylic acid biosynthetic process                                  |
| <b><u>Q9HWG3</u></b> | Pyochelin biosynthesis protein PchD                         | pchD PA4228       | Catalytic activity                                                                                   |
| <b><u>Q9HUM3</u></b> | Protein HflC                                                | hflC PA4941       | Peptidase activity                                                                                   |
| <b><u>Q9HVI3</u></b> | Uncharacterized protein                                     | PA4606            | Cellular response to nutrient levels, Starvation response                                            |
| <b><u>Q9I6K7</u></b> | Sulfate-binding protein                                     | sbp PA0283        | Sulfate transmembrane transporter activity                                                           |
| <b><u>Q9I765</u></b> | Oligopeptidase A                                            | prlC PA0067       | Metal ion binding, signal peptide processing                                                         |
| <b><u>Q9HUG9</u></b> | Bifunctional protein HldE                                   | hldE rfaE, PA4996 | ADP-L-glycero-beta-D-manno-heptose biosynthesis, Carbohydrate phosphorylation, LPS core biosynthesis |
| <b><u>Q9HUA7</u></b> | Probable binding protein component of ABC transporter       | PA5076            | Ionotropic glutamate receptor                                                                        |
| <b><u>Q9HU18</u></b> | C4-dicarboxylate-binding periplasmic protein DctP           | dctP PA5167       | C-4 dicarboxylate transport, transmembrane transport                                                 |
| <b><u>Q9I3L9</u></b> | Sulfate-binding protein of ABC transporter                  | cysP PA1493       | Sulfate transmembrane transporter activity                                                           |
| <b><u>Q9I1R3</u></b> | Probable binding protein component of ABC transporter       | PA2204            | ionotropic glutamate receptor activity                                                               |
| <b><u>Q9I6L0</u></b> | Sulfate/thiosulfate import ATP-binding protein CysA         | cysA PA0280       | Sulfate transmembrane transporter activity                                                           |
| <b><u>Q9HX28</u></b> | Uncharacterized protein                                     | PA3992            | Metal ion binding                                                                                    |
| <b><u>Q9HVF9</u></b> | Uncharacterized protein                                     | PA4632            | Metallopeptidase activity                                                                            |
| <b><u>Q9HZ48</u></b> | Probable binding protein component of ABC sugar transporter | PA3190            | Carbohydrate transport                                                                               |
| <b><u>Q9HY13</u></b> | Uncharacterized protein                                     | PA3613            | Carbohydrate metabolic process                                                                       |
| <b><u>Q9I427</u></b> | Cytochrome bo(3) ubiquinol oxidase subunit 2                | cyoA PA1317       | ATP synthesis coupled electron transport, copper ion binding                                         |
| <b><u>Q9HVZ0</u></b> | Phosphoheptose isomerase                                    | gmhA PA4425       | Carbohydrate biosynthesis, Lipopolysaccharide core region biosynthesis                               |
| <b><u>Q9HU53</u></b> | 2,3-bisphosphoglycerate-independent phosphoglycerate mutase | gpmI pgm, PA5131  | Glycolysis                                                                                           |
| <b><u>Q9I3G1</u></b> | Cytochrome c oxidase, cbb3-type, CcoO subunit               | ccoO2 PA1556      | Aerobic respiration, respiratory electron transport chain                                            |
| <b><u>Q9I3D5</u></b> | Succinate dehydrogenase flavoprotein subunit                | sdhA PA1583       | Anaerobic respiration, Tricarboxylic acid cycle                                                      |
| <b><u>Q9HTQ4</u></b> | Cytochrome c5                                               | cycB PA5300       | Electron transfer activity, heme binding, iron ion binding                                           |

|                      |                                                           |                             |                                                                                                                              |
|----------------------|-----------------------------------------------------------|-----------------------------|------------------------------------------------------------------------------------------------------------------------------|
| <b><u>P00106</u></b> | Cytochrome c4                                             | cc4 PA5490                  | Electron transfer activity, heme binding, iron ion binding                                                                   |
| <b><u>Q9HTD7</u></b> | Aspartate ammonia-lyase                                   | aspA PA5429                 | Aspartate metabolic process, tricarboxylic acid cycle                                                                        |
| <b><u>Q7DC81</u></b> | Phenazine biosynthesis protein PhzE                       | phzE1 phzE2, PA1903, PA4214 | Glutamine metabolic process, tryptophan biosynthetic process, phenazine biosynthetic process                                 |
| <b><u>Q51342</u></b> | Amidophosphoribosyltransferase                            | purF PA3108                 | IMP biosynthetic process, Purine nucleobase biosynthetic process, Nucleoside metabolic process, Glutamine metabolic process, |
| <b><u>Q9HXQ3</u></b> | Uncharacterized protein                                   | PA3741                      | acyl-CoA metabolic process, fatty acid metabolic process                                                                     |
| <b><u>P42512</u></b> | Fe(3+)-pyochelin receptor                                 | fptA PA4221                 | Iron transport, iron ion homeostasis, siderophore transport                                                                  |
| <b><u>Q9I6B4</u></b> | Thiazole synthase                                         | thiG PA0381                 | Transferase activity, thiamine diphosphate biosynthesis                                                                      |
| <b><u>Q9HVV3</u></b> | Nucleotide-binding protein PA4465                         | PA4465                      | ATP binding, GTP binding                                                                                                     |
| <b><u>Q51551</u></b> | Dihydroorotase-like protein                               | pyrC' pyrX, PA0401          | Purine nucleobase catabolic process, Pyrimidine nucleotide biosynthetic process                                              |
| <b><u>Q59654</u></b> | Orotidine 5'-phosphate decarboxylase                      | pyrF PA2876                 | Pyrimidine biosynthetic process                                                                                              |
| <b><u>Q9HUV8</u></b> | Phosphoribosylamine--glycine ligase                       | purD PA4855                 | Purine nucleobase biosynthetic process, IMP biosynthetic process                                                             |
| <b><u>Q9I671</u></b> | Glutaryl-CoA dehydrogenase                                | gcdH PA0447                 | Acyl-CoA dehydrogenase activity, flavin adenine dinucleotide binding                                                         |
| <b><u>Q9I1Z9</u></b> | Putative hydro-lyase PA2116                               | PA2116                      | Lyase activity                                                                                                               |
| <b><u>Q9HVB9</u></b> | Carbonic anhydrase                                        | PA4676                      | Carbon utilization                                                                                                           |
| <b><u>Q9I030</u></b> | Probable glutathione S-transferase                        | PA2813                      | Transferase activity                                                                                                         |
| <b><u>Q9I5Y8</u></b> | Transketolase                                             | tktA PA0548                 | Transketolase activity                                                                                                       |
| <b><u>Q9HZA8</u></b> | Folypolyglutamate synthetase                              | folC PA3111                 | Dihydrofolate synthase activity, tetrahydrofolypolyglutamate synthase activity                                               |
| <b><u>Q9HTD0</u></b> | Probable biotin carboxylase subunit of a transcarboxylase | PA5436                      | Ligase activity                                                                                                              |
| <b><u>Q9HT95</u></b> | Acetyltransferase PA5475                                  | PA5475                      | Transferase activity                                                                                                         |
| <b><u>Q9HYR8</u></b> | Probable non-ribosomal peptide synthetase                 | PA3327                      | Biosynthetic process                                                                                                         |
| <b><u>Q9HY07</u></b> | Ferredoxin 1                                              | fdxA PA3621                 | electron transfer activity, metal ion binding                                                                                |
| <b><u>G3XCV2</u></b> | Dihydroaeruginosic acid synthetase                        | pchE PA4226                 | Metabolic process                                                                                                            |
| <b><u>Q9I179</u></b> | Probable non-ribosomal peptidesynthetase                  | PA2402                      | Metabolic process                                                                                                            |
| <b><u>Q9I3P2</u></b> | Probable short-chain dehydrogenase                        | PA1470                      | Dehydrogenase activity                                                                                                       |

|                      |                                                     |                    |                                                                       |
|----------------------|-----------------------------------------------------|--------------------|-----------------------------------------------------------------------|
| <b><u>Q9HYR5</u></b> | Probable short chain dehydrogenase                  | PA3330             | Dehydrogenase activity                                                |
| <b><u>Q9HV16</u></b> | Uncharacterized protein                             | PA4792             | Lipid metabolic process                                               |
| <b><u>G3XD40</u></b> | Probable acyl-CoA thiolase                          | PA3925             | Fatty acid beta oxidation                                             |
| <b><u>Q9HYR2</u></b> | 3-oxoacyl-[acyl-carrier-protein] synthase 3         | fabH PA3333        | Fatty acid biosynthesis                                               |
| <b><u>P15713</u></b> | Non-hemolytic phospholipase C                       | plcN PA3319        | Lipid catabolic process, phosphatidylcholine phospholipase C activity |
| <b><u>O54439</u></b> | Acyl carrier protein 1                              | acpP1 acpP, PA2966 | Lipid A Biosynthetic process                                          |
| <b><u>G3XCV6</u></b> | Conserved cytoplasmic membraneprotein, CmpX protein | cmpX PA1775        | Transmembrane transport                                               |

Table S12. The newly detected metabolism-related proteins after 3-HPAA exposure

| <b><u>Protein ID</u></b> | <b><u>Protein Name</u></b>                                         | <b><u>Gene Name</u></b> | <b><u>Function</u></b>                                  |
|--------------------------|--------------------------------------------------------------------|-------------------------|---------------------------------------------------------|
| <b><u>Q9HX03</u></b>     | Ethanolamine ammonia-lyase large subunit                           | eutB PA4024             | Amino acid metabolic process                            |
| <b><u>G3XD76</u></b>     | 2,3,4,5-tetrahydropyridine-2,6-dicarboxylate N-succinyltransferase | dapD PA3666             | Lysine biosynthetic process                             |
| <b><u>Q59653</u></b>     | Aspartate carbamoyltransferase                                     | pyrB PA0402             | Amino acid metabolic process                            |
| <b><u>P38103</u></b>     | 4-hydroxy-tetrahydrodipicolinate reductase                         | dapB PA4759             | Lysine biosynthetic process                             |
| <b><u>Q91235</u></b>     | Kynureninase                                                       | kynU PA2080             | Alanine biosynthetic process                            |
| <b><u>Q9HVV9</u></b>     | Histidinol dehydrogenase                                           | hisD PA4448             | Histidine biosynthetic process                          |
| <b><u>Q912Z5</u></b>     | Probable amidotransferase                                          | PA1742                  | Glutamine metabolic process                             |
| <b><u>Q9HZ66</u></b>     | Phosphoserine aminotransferase                                     | serC PA3167             | Serine biosynthetic process                             |
| <b><u>Q9HTE9</u></b>     | Serine hydroxymethyltransferase 1                                  | glyA1 PA5415            | Glycine biosynthetic process                            |
| <b><u>Q91452</u></b>     | Probable 3-mercaptopyruvate sulfurtransferase                      | sseA PA1292             | Cysteine metabolic process                              |
| <b><u>Q91352</u></b>     | Bacteriohemerythrin                                                | PA1673                  | Oxygen carrier activity                                 |
| <b><u>Q9HTV9</u></b>     | Probable ATP-binding/permease fusion ABC transporter               | PA5231                  | ATPase activity                                         |
| <b><u>Q9HXR4</u></b>     | Uncharacterized protein                                            | PA3728                  | ATPase activity                                         |
| <b><u>Q9HVS5</u></b>     | Probable binding protein component of ABC transporter              | PA4496                  | Transmembrane transport                                 |
| <b><u>Q91672</u></b>     | Uncharacterized protein                                            | PA0446                  | Catalytic activity                                      |
| <b><u>Q9HTZ7</u></b>     | Phosphoenolpyruvate carboxykinase (ATP)                            | pckA PA5192             | Gluconeogenesis                                         |
| <b><u>Q915Y1</u></b>     | Fructose-bisphosphate aldolase                                     | fbpA, PA0555            | Glycolysis                                              |
| <b><u>Q913G5</u></b>     | Cbb3-type cytochrome c oxidase subunit                             | ccoP1 PA1552            | Oxidative phosphorylation                               |
| <b><u>Q915E3</u></b>     | Citrate synthase                                                   | prpC PA0795             | Tricarboxylic acid cycle                                |
| <b><u>Q910J8</u></b>     | NADH-quinone oxidoreductase subunit E                              | nuoE PA2640             | Respiratory electron transport chain                    |
| <b><u>Q916H4</u></b>     | Uncharacterized protein                                            | PA0317                  | Respiratory electron transport chain, lactate oxidation |

|                      |                                                           |                    |                                                       |
|----------------------|-----------------------------------------------------------|--------------------|-------------------------------------------------------|
| <b><u>Q9HVF1</u></b> | Probable malate:quinone oxidoreductase 2                  | mqo2 mqoB, PA4640  | Tricarboxylic acid cycle                              |
| <b><u>Q9I139</u></b> | L-serine dehydratase                                      | sdaA PA2443        | Gluconeogenesis                                       |
| <b><u>Q9HTJ5</u></b> | Phosphate transport system permease protein PstA          | pstA PA5367        | Phosphate ion transmembrane transport                 |
| <b><u>Q9HWA8</u></b> | Phosphate transporter                                     | PA4292             | Phosphate ion transmembrane transport                 |
| <b><u>P40695</u></b> | Phospholipase C accessory protein PlcR                    | plcR PA0843        | Regulation of synthesis of phospholipase C (possible) |
| <b><u>Q9HW15</u></b> | Probable short-chain dehydrogenase                        | speA PA4389        | Fatty acid elongation                                 |
| <b><u>Q9HZP8</u></b> | Enoyl-[acyl-carrier-protein] reductase [NADH]             | fabV PA2950        | Fatty acid biosynthesis                               |
| <b><u>P37799</u></b> | Biotin carboxyl carrier protein of acetyl-CoA carboxylase | accB fabE, PA4847  | Fatty acid biosynthesis                               |
| <b><u>G3XD52</u></b> | Uncharacterized protein                                   | PA3302             | Fatty acid synthase activity, Fatty acid biosynthesis |
| <b><u>Q9I2A8</u></b> | Acetyl-CoA acetyltransferase                              | atoB PA2001        | Fatty acid beta oxidation                             |
| <b><u>Q9HX44</u></b> | Probable acyl-CoA dehydrogenase                           | PA3972             | Flavin adenine dinucleotide binding                   |
| <b><u>Q9I558</u></b> | Acetyl-coenzyme A synthetase 1                            | acsA1 PA0887       | Acetyl-Co A Biosynthetic process                      |
| <b><u>Q9HYA2</u></b> | Probable short-chain dehydrogenase                        | PA3507             | Nucleotide binding                                    |
| <b><u>Q9HWX5</u></b> | 6,7-dimethyl-8-ribityllumazine synthase                   | ribH ribE, PA4053  | Riboflavin biosynthesis                               |
| <b><u>Q9HXM6</u></b> | GMP synthase[glutamine-hydrolyzing]                       | guaA PA3769        | GMP biosynthesis in purine metabolism                 |
| <b><u>Q9HUT1</u></b> | Uncharacterized protein                                   | PA4882             | Nitrate assimilation                                  |
| <b><u>P43898</u></b> | Oxygen-dependent coproporphyrinogen-III oxidase           | hemF PA0024        | Protoporphyrin-IX biosynthesis                        |
| <b><u>Q51548</u></b> | L-ornithine N(5)-monooxygenase                            | pvdA pvd-1, PA2386 | Pyoverdinin biosynthesis, siderophore biosynthesis    |
| <b><u>Q9I0W4</u></b> | Toluene 1,2-dioxygenase alpha subunit                     | xytX PA2518        | Dioxygenase activity                                  |

Table S13. The undetected virulence-related proteins after 3-HPAA exposure

| <b>Protein ID</b>    | <b>Protein Name</b>                            | <b>Gene Name</b> | <b>Function</b>                                                                                                                                                                 |
|----------------------|------------------------------------------------|------------------|---------------------------------------------------------------------------------------------------------------------------------------------------------------------------------|
| <b><u>P26276</u></b> | Phosphomannomutase/ phosphoglucomutase protein | algC PA5322      | Alginate biosynthetic process, GDP-alpha-D-mannose biosynthetic process, lipopolysaccharide core region biosynthetic process, O antigen biosynthetic process and pathogenicity. |
| <b><u>P55222</u></b> | Cyclic AMP receptor-like protein               | vfr PA0652       | Pathogenesis                                                                                                                                                                    |
| <b><u>Q9HYR3</u></b> | Uncharacterized PhzA/B-like protein PA3332     | PA3332           | Antibiotic biosynthesis                                                                                                                                                         |

Table S14. The newly detected virulence-related proteins after 3-HPAA exposure

| <b>Protein ID</b>    | <b>Protein Name</b>            | <b>Gene Name</b> | <b>Function</b>                                                        |
|----------------------|--------------------------------|------------------|------------------------------------------------------------------------|
| <b><u>Q9I3D8</u></b> | Uncharacterized protein PA1579 | PA1579           | It might have a role in interaction of the bacterium with animal cells |
| <b><u>Q9HVG7</u></b> | Uncharacterized protein        | PA4624           | Single-species biofilm formation                                       |

Table S15. The undetected uncharacterized proteins after 3-HPAA exposure

| <b>Protein ID</b>    | <b>Protein Name</b>                                                                                         | <b>Gene Name</b> | <b>Function</b> | <b>Protein Blast Results</b>                                  |
|----------------------|-------------------------------------------------------------------------------------------------------------|------------------|-----------------|---------------------------------------------------------------|
| <b><u>Q9HW11</u></b> | UPF0234 protein<br>PA4395                                                                                   | PA4395           | Uncharacterized | YajQ family cyclic di-GMP-binding protein                     |
| <b><u>Q9HTF0</u></b> | Uncharacterized protein                                                                                     | PA5414           | Uncharacterized | Hypothetical protein                                          |
| <b><u>Q9HZC7</u></b> | Uncharacterized protein                                                                                     | PA3081           | Uncharacterized | DUF1329 domain-containing protein                             |
| <b><u>Q9I748</u></b> | Uncharacterized protein                                                                                     | PA0084           | Uncharacterized | Type VI secretion system contractile sheath large subunit     |
| <b><u>Q9HTQ1</u></b> | Uncharacterized protein                                                                                     | PA5303           | Uncharacterized | RidA Family protein                                           |
| <b><u>Q9I5H1</u></b> | Uncharacterized protein                                                                                     | PA0758           | Uncharacterized | HDOD domain-containing protein                                |
| <b><u>Q9I456</u></b> | Probable outer membrane protein                                                                             | PA1288           | Uncharacterized | Hypothetical protein, Long-chain fatty acid transport protein |
| <b><u>Q9HXI3</u></b> | Uncharacterized protein                                                                                     | PA3819           | Uncharacterized | Glycine zipper 2TM domain-containing protein                  |
| <b><u>Q9I079</u></b> | Uncharacterized protein                                                                                     | PA2764           | Uncharacterized | Alpha/beta hydrolase                                          |
| <b><u>Q9I746</u></b> | Uncharacterized protein                                                                                     | PA0086           | Uncharacterized | Tetratricopeptide repeat protein                              |
| <b><u>Q9I2X1</u></b> | Uncharacterized protein                                                                                     | PA1768           | Uncharacterized | ATP-dependent zinc protease                                   |
| <b><u>Q9I6H6</u></b> | Uncharacterized protein                                                                                     | PA0315           | Uncharacterized | DUF4399 domain-containing protein                             |
| <b><u>Q9HVV9</u></b> | Uncharacterized protein                                                                                     | PA4611           | Uncharacterized | DUF465 domain-containing protein                              |
| <b><u>Q9HW30</u></b> | Uncharacterized protein                                                                                     | PA4372           | Uncharacterized | Imelysin                                                      |
| <b><u>Q9HVS6</u></b> | Uncharacterized protein                                                                                     | PA4495           | Uncharacterized | DUF541 domain-containing protein                              |
| <b><u>Q9I5Z9</u></b> | Uncharacterized protein                                                                                     | PA0537           | Uncharacterized | LemA family protein                                           |
| <b><u>Q9HXJ6</u></b> | Uncharacterized protein                                                                                     | PA3801           | Uncharacterized | Tetratricopeptide repeat protein                              |
| <b><u>Q9HYI6</u></b> | UPF0162 protein<br>PA3419                                                                                   | PA3419           | Uncharacterized | Transglut_core2 superfamily hypothetical protein              |
| <b><u>Q9HU46</u></b> | Uncharacterized protein                                                                                     | PA5138           | Uncharacterized | ABC transporter substrate-binding protein                     |
| <b><u>Q9HYJ2</u></b> | Uncharacterized protein                                                                                     | PA3413           | Uncharacterized | YebG superfamily hypothetical protein                         |
| <b><u>Q9HXR1</u></b> | Uncharacterized protein                                                                                     | PA3731           | Uncharacterized | PspA/IM30 family protein                                      |
| <b><u>Q9HU31</u></b> | Amino acid<br>(Lysine/arginine/ornithine/histidine/octopine)<br>ABC transporter periplasmic binding protein | PA5153           | Uncharacterized | Amino acid ABC transporter substrate-binding protein          |
| <b><u>G3XD27</u></b> | Uncharacterized protein                                                                                     | PA5055           | Uncharacterized | DUF971 domain-containing protein                              |
| <b><u>Q9HV96</u></b> | Uncharacterized protein                                                                                     | PA4701           | Uncharacterized | COG2187 and AA_33 superfamilies hypothetical protein          |
| <b><u>Q9HTR9</u></b> | Uncharacterized protein                                                                                     | PA5285           | Uncharacterized | Hypothetical protein                                          |
| <b><u>Q9I020</u></b> | Uncharacterized protein                                                                                     | PA2823           | Uncharacterized | ATP-binding protein                                           |
| <b><u>Q9HTY0</u></b> | Probable secretion pathway ATPase                                                                           | PA5210           | Uncharacterized | Type II/IV secretion system protein                           |
| <b><u>Q9I585</u></b> | Uncharacterized protein                                                                                     | PA0856           | Uncharacterized | DUF2059 domain-containing protein                             |
| <b><u>Q9I749</u></b> | Uncharacterized protein                                                                                     | PA0083           | Uncharacterized | Type VI secretion system contractile sheath small subunit     |

|                      |                                    |        |                 |                                   |
|----------------------|------------------------------------|--------|-----------------|-----------------------------------|
| <b><u>Q9HZ94</u></b> | Uncharacterized protein            | PA3130 | Uncharacterized | Acyl-CoA thioesterase             |
| <b><u>Q9I2R6</u></b> | Uncharacterized protein            | PA1829 | Uncharacterized | Phosphotransferase family protein |
| <b><u>Q9HXF7</u></b> | Nucleoid-associated protein PA3849 | PA3849 | Uncharacterized | Nucleoid-associated protein YejK  |
| <b><u>Q9HZ96</u></b> | Probable short-chain dehydrogenase | PA3128 | Uncharacterized | SDR family oxidoreductase         |

Table S16. The newly detected uncharacterized proteins after 3-HPAA exposure

| <b>Protein ID</b>    | <b>Protein Name</b>     | <b>Gene Name</b> | <b>Function</b> | <b>Protein Blast Results</b>                                   |
|----------------------|-------------------------|------------------|-----------------|----------------------------------------------------------------|
| <b><u>Q9HTL9</u></b> | Uncharacterized protein | PA5339           | Uncharacterized | RidA Family protein                                            |
| <b><u>Q9I622</u></b> | Uncharacterized protein | PA0496           | Uncharacterized | Biotin-dependent carboxyltransferase family protein            |
| <b><u>Q9HXG8</u></b> | Uncharacterized protein | PA3836           | Uncharacterized | ABC transporter substrate binding protein                      |
| <b><u>Q9HTQ5</u></b> | Uncharacterized protein | PA5299           | Uncharacterized | Acetyl-CoA hydrolase, putative                                 |
| <b><u>Q9I3B5</u></b> | Uncharacterized protein | PA1606           | Uncharacterized | DUF3859 Domain containing protein, protein of unknown function |
| <b><u>Q9HTC5</u></b> | Uncharacterized protein | PA5441           | Uncharacterized | Hypothetical protein, Outer membrane assembly lipoprotein YfiO |
| <b><u>Q9I2Z1</u></b> | Uncharacterized protein | PA1746           | Uncharacterized | Hypothetical protein, Appr-1-p processing protein              |

Table S17. Protein ID and Gene Name Lists of Mutually Unchanged Proteins

(Search the ID in “uniprot.org” for the detailed information about the protein of interest)

| <b>Protein IDs</b> | <b>Gene Names</b> |
|--------------------|-------------------|
| P48372             | gyrA PA3168       |
| P28811             | mmsB PA3569       |
| Q9HWC6             | rplA PA4273       |
| Q9I500             | PA0959            |
| O52760             | rpoA PA4238       |
| Q9HWF0             | rplF PA4248       |
| Q9HUC3             | phaF PA5060       |
| P13982             | arcC PA5173       |
| Q9HVC5             | prs PA4670        |
| Q9HZP5             | PA2953            |

---

|        |                   |
|--------|-------------------|
| Q9I2R5 | PA1830            |
| Q59637 | aceE aceA, PA5015 |
| Q9I2W7 | PA1772            |
| Q9HY22 | erdR PA3604       |
| Q9HTD1 | PA5435            |
| Q9HVV3 | rpsI PA4432       |
| Q9HW32 | icmP PA4370       |
| Q9I576 | hpd PA0865        |
| Q9HYX8 | PA3262            |
| Q9HZH7 | moaB2 PA3029      |
| Q9HWE3 | rpmC PA4255       |
| Q9I659 | PA0459            |
| Q9I5E2 | prpB PA0796       |
| Q9HYZ6 | minD PA3244       |
| P50987 | argH PA5263       |
| Q9I0A0 | infC PA2743       |
| Q9HT80 | polA PA5493       |
| Q9I0L2 | mnmA trmU, PA2626 |
| Q9HWD8 | rplB PA4260       |
| Q9I2V5 | acnB PA1787       |
| O50175 | astB aruB, PA0899 |
| Q9HWD6 | rplD PA4262       |
| Q9HWD0 | rpsL PA4268       |
| P72173 | aspC PA3139       |
| Q9HXN2 | purL PA3763       |
| Q9HWE2 | rplP PA4256       |
| Q9I1M0 | bkdB PA2249       |
| Q9I0K4 | PA2634            |
| Q9I4W9 | nadA PA1004       |
| Q9I6M4 | davT PA0266       |
| Q9HVV2 | rplM PA4433       |
| P47205 | lpxC envA, PA4406 |
| Q9HTM1 | rpoZ PA5337       |

---

---

|        |              |
|--------|--------------|
| Q9I0R1 | PA2575       |
| Q9I0M6 | serS PA2612  |
| Q9I6J1 | spuD PA0300  |
| Q9HZJ5 | topA PA3011  |
| Q9I3D3 | sucA PA1585  |
| Q9HX05 | PA4022       |
| Q59636 | ndk PA3807   |
| Q9I4X2 | pqsB PA0997  |
| Q9I747 | hcp1 PA0085  |
| Q9HTR6 | glnK PA5288  |
| Q9I5Y4 | pgk PA0552   |
| Q9I636 | glcB PA0482  |
| Q9HW68 | PA4333       |
| Q9HXL0 | PA3785       |
| Q9HZK4 | PA3001       |
| Q9HYZ0 | PA3250       |
| Q9HWC7 | rplJ PA4272  |
| P13794 | oprF PA1777  |
| Q9HWD9 | rpsS PA4259  |
| Q9HWF8 | rpsK PA4240  |
| Q9I6Z3 | ahpC PA0139  |
| Q9I5U9 | PA0588       |
| Q9HWE4 | rpsQ PA4254  |
| Q9HWD1 | rpsG PA4267  |
| Q51404 | fumC2 PA4470 |
| Q9HVA8 | hitA PA4687  |
| Q9HVN5 | clpB PA4542  |
| Q9HUY5 | mgtA PA4825  |
| P34002 | aroB PA5038  |
| Q9I047 | tal PA2796   |
| Q9I2W9 | ppsA PA1770  |
| Q9HTP2 | PA5312       |
| Q9HZA4 | leuD PA3120  |

---



---

|         |                    |
|---------|--------------------|
| Q9HVT7  | gatB PA4484        |
| Q9I344  | aroC PA1681        |
| Q9HXJ4  | ispG PA3803        |
| Q9HW04  | argJ PA4402        |
| P57112  | sthA sth, PA2991   |
| Q9HV55  | infB PA4744        |
| Q9I4W0  | purC PA1013        |
| Q9HXP9  | rpsP PA3745        |
| Q9I5I4  | PA0745             |
| Q9HZ98  | ibpA PA3126        |
| Q9HT17  | atpH PA5557        |
| Q9I5Z0  | metK PA0546        |
| Q9HZE0  | gdhB PA3068        |
| Q9I5E4  | PA0794             |
| P08308  | arcB PA5172        |
| Q9HWD2  | fusA fusA1, PA4266 |
| Q9HUD3  | PA5046             |
| Q9HT21  | atpC PA5553        |
| Q9HZIP7 | etfA PA2951        |
| Q9HZJ2  | fadB PA3014        |
| Q9I4I2  | nrdB PA1155        |
| P05384  | hupB PA1804        |
| Q9HV43  | dnaK PA4761        |
| Q9HZF5  | PA3053             |
| Q9I3D2  | sucB PA1586        |
| P53641  | sodB PA4366        |
| Q9I5F6  | putA PA0782        |
| Q9HWW7  | PA4061             |
| Q9HT16  | atpF PA5558        |
| Q9HV51  | tpiA PA4748        |
| Q51567  | sucD PA1589        |
| Q9I2U0  | clpX PA1802        |
| Q9I4Z4  | pal oprL, PA0973   |

---

---

|        |                         |
|--------|-------------------------|
| Q51344 | asd PA3117              |
| P57668 | tpx PA2532              |
| Q59638 | aceF aceB, PA5016       |
| Q9HX76 | PA3940                  |
| Q9HV54 | nusA PA4745             |
| Q9HTN4 | coaC PA5320             |
| Q9HXV4 | adk PA3686              |
| Q9HW45 | xenB PA4356             |
| Q9I0J6 | nuoG PA2642             |
| Q9HVC4 | rplY etc, PA4671        |
| Q9X2T1 | trxA trx, PA5240        |
| O30508 | aruC argD, astC, PA0895 |
| Q9I338 | PA1689                  |
| P28810 | mmsA PA3570             |
| Q9HU24 | rmlB PA5161             |
| P52002 | mexB PA0426             |
| Q9HU11 | PA5178                  |
| Q9I6H5 | serA PA0316             |
| Q9HVY4 | PA4431                  |
| Q9HTD9 | adhA PA5427             |
| Q9I0D5 | PA2707                  |
| Q9I0A3 | pheS PA2740             |
| Q9HVL6 | rplU PA4568             |
| Q9HWF7 | rpsM PA4241             |
| Q9I4I1 | nrdA PA1156             |
| Q9HV46 | greA PA4755             |
| Q9HUC5 | hslU PA5054             |
| Q9HVD1 | pagL PA4661             |
| P37798 | accC fabG, PA4848       |
| P20580 | trpE PA0609             |
| P43335 | phhB PA0871             |
| Q9I3B2 | fabB PA1609             |
| Q9I3G2 | ccoP2 PA1555            |

---

---

|         |                          |
|---------|--------------------------|
| Q9HTM3  | PA5335                   |
| Q9I078  | PA2765                   |
| Q9I4X1  | pqsC PA0998              |
| Q9I5U3  | surA PA0594              |
| Q9HWF1  | rplR PA4247              |
| Q9I2Y7  | PA1750                   |
| O69077  | lysC PA0904              |
| Q9H XK2 | PA3795                   |
| Q9HW86  | mvaT PA4315              |
| P30718  | groL groEL, mopA, PA4385 |
| Q9HX01  | PA4026                   |
| Q9I7A8  | def PA0019               |
| Q9HWE1  | rpsC PA4257              |
| Q9HUM9  | rpsF PA4935              |
| Q51384  | PA3808                   |
| Q9HVW4  | PA4453                   |
| Q9HWC8  | rplL PA4271              |
| P08280  | recA PA3617              |
| Q9I0T1  | PA2553                   |
| P43501  | pilH PA0409              |
| Q9I3D4  | sdhB PA1584              |
| Q9I407  | ansB PA1337              |
| P00282  | azu PA4922               |
| P13981  | arcA PA5171              |
| Q9I3F5  | acnA PA1562              |
| Q9I184  | pvdF PA2396              |
| Q9HXQ2  | rplS PA3742              |
| Q9I6M5  | davD PA0265              |
| Q9I0A2  | rplT PA2741              |
| O82852  | pyrH PA3654              |
| Q9HV69  | panC PA4730              |
| Q9HVA2  | ilvC PA4694              |
| P15276  | algP algR3, PA5253       |

---

---

|        |                          |
|--------|--------------------------|
| Q9I1L9 | lpdV PA2250              |
| Q9I137 | gcvP1 PA2445             |
| Q51422 | aspS PA0963              |
| Q9I6G0 | ilvA1 ilvA, PA0331       |
| Q9HYU4 | fadD1 PA3299             |
| Q9HVT8 | gatA PA4483              |
| Q9I140 | gcvT2 PA2442             |
| P30720 | groS groES, mopB, PA4386 |
| Q9HZN4 | rpmF PA2970              |
| Q9HUN2 | rplI PA4932              |
| Q9I0D3 | cysK PA2709              |
| Q9HTN8 | rpmB PA5316              |
| P38100 | carB PA4756              |
| Q9HW49 | PA4352                   |
| Q9HYY3 | prc PA3257               |
| Q9HX91 | PA3922                   |
| Q9I2U2 | tig PA1800               |
| Q9HXZ5 | eno PA3635               |
| Q9I7C2 | gyrB PA0004              |
| Q51561 | rpoB PA4270              |
| Q9I5H0 | PA0759                   |
| Q9HY77 | PA3533                   |
| Q9HWC9 | rpoC PA4269              |
| Q9I5Q9 | argC PA0662              |
| Q9HZJ3 | fadA PA3013              |
| Q9HT20 | atpD PA5554              |
| Q9I3C5 | htpG PA1596              |
| P43903 | qor PA0023               |
| Q9HX33 | leuS PA3987              |
| Q9HZ71 | rpsA PA3162              |
| P14165 | gltA PA1580              |
| Q9HTU9 | PA5245                   |
| Q9HUC8 | argS PA5051              |

---

---

|        |              |
|--------|--------------|
| P77915 | hemN PA1546  |
| Q9HWD4 | rpsJ PA4264  |
| Q9HV59 | pnp PA4740   |
| P11221 | oprI PA2853  |
| Q9I083 | PA2760       |
| Q9HYL8 | PA3383       |
| Q9HU65 | glnA PA5119  |
| Q9I690 | PA0423       |
| Q9I687 | metF PA0430  |
| P09591 | tufA PA4265  |
| P09591 | tufB PA4277  |
| Q9HWE6 | rplX PA4252  |
| O52759 | rpsD PA4239  |
| Q9I296 | liuA PA2015  |
| Q9HX20 | proA PA4007  |
| Q9I0K9 | purB PA2629  |
| Q9I138 | glyA2 PA2444 |
| P72157 | purE PA5426  |
| Q9I402 | PA1342       |
| Q9HTV1 | rho PA5239   |
| Q59643 | hemB PA5243  |
| Q9HWE7 | rplE PA4251  |
| Q9HXZ4 | pyrG PA3637  |
| Q9HWX4 | ribB PA4054  |
| Q9I5V8 | rpsU PA0579  |
| Q9HZZ2 | efp PA2851   |
| G3XD47 | aotJ PA0888  |
| Q9HWF4 | rplO PA4244  |
| Q9HVV6 | trpS PA4439  |
| Q9HVV5 | PA4463       |
| Q9HVM8 | rne PA2976   |
| O82853 | frt PA3653   |
| Q9I502 | proS PA0956  |

---

---

|        |              |
|--------|--------------|
| Q9I7B8 | glyS PA0008  |
| Q9HYT5 | PA3309       |
| Q9HWC5 | rplK PA4274  |
| Q9HWD5 | rplC PA4263  |
| O52762 | katA PA4236  |
| Q9HWF3 | rpmD PA4245  |
| Q9HWE8 | rpsN PA4250  |
| Q9I1F7 | PA2318       |
| Q9HV42 | grpE PA4762  |
| P21175 | braC PA1074  |
| Q9I2U9 | ppiB PA1793  |
| Q9HXM5 | guaB PA3770  |
| Q9HT25 | glmS PA5549  |
| Q9HVV6 | PA4429       |
| Q9I1N7 | pslB PA2232  |
| Q9HVJ1 | PA4595       |
| P53593 | sucC PA1588  |
| Q9I0L5 | icd PA2623   |
| Q9I297 | liuB PA2014  |
| Q9HY81 | PA3529       |
| Q9HVI7 | glyA2 PA4602 |
| P0DP44 | ppk PA5242   |
| Q9I658 | PA0460       |
| Q9I7B7 | glyQ PA0009  |
| O87125 | cheB1 PA1459 |
| Q9I3D1 | lpdG PA1587  |
| Q9HY84 | argG PA3525  |
| Q9I0L4 | idh PA2624   |
| Q9HV50 | glmM PA4749  |
| O82851 | tsf PA3655   |
| Q9HX12 | PA4015       |
| Q9HVQ3 | speC PA4519  |
| Q9HWC4 | nusG PA4275  |

---

---

|        |                   |
|--------|-------------------|
| Q9I5G8 | lepA le, PA0767   |
| Q9HXJ9 | PA3798            |
| O52761 | rplQ PA4237       |
| Q9HWF2 | rpsE PA4246       |
| Q9I685 | ahcY sahH, PA0432 |
| O54438 | fabG PA2967       |
| Q9I553 | alaS PA0903       |
| Q9I6J2 | spuC PA0299       |
| Q9I6E0 | ilvD PA0353       |
| P38098 | carA PA4758       |
| P24559 | pilT PA0395       |
| Q9HW72 | pykA PA4329       |
| Q9I0Y8 | mexF PA2494       |
| Q9I185 | pvdO PA2395       |
| Q9HWW1 | oprG PA4067       |
| Q9HWE9 | rpsH PA4249       |
| Q9HYZ3 | apeB PA3247       |
| Q9I171 | PA2410            |
| P43336 | phhC PA0870       |
| P26275 | algR PA5261       |
| O82850 | rpsB PA3656       |
| Q9HT18 | atpA PA5556       |
| Q9HVS8 | roxR PA4493       |
| Q9HUM6 | purA PA4938       |
| Q9I015 | PA2828            |
| Q9HYG6 | PA3440            |
| Q9I4Z7 | PA0962            |
| Q9I0H1 | PA2667            |
| Q9I662 | PA0456            |
| Q9HYK7 | fpr PA3397        |
| P20577 | trpC PA0651       |
| G3XDA8 | pstS PA5369       |
| Q9HXZ2 | accA PA3639       |

---

---

|        |                    |
|--------|--------------------|
| Q9HVF2 | PA4639             |
| Q9HTQ0 | dadA1 dadA, PA5304 |
| Q9I4W2 | PA1011             |
| Q9HXU0 | lysS PA3700        |
| Q9HZP6 | etfB PA2952        |

---





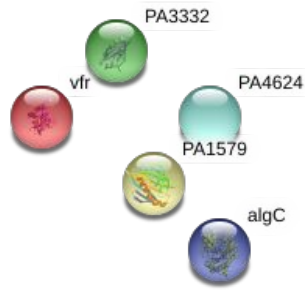

Figure S2. Interaction network of virulence-related undetected and newly detected proteins after 3-HPAA exposure by STRING. Proteins are represented as nodes.

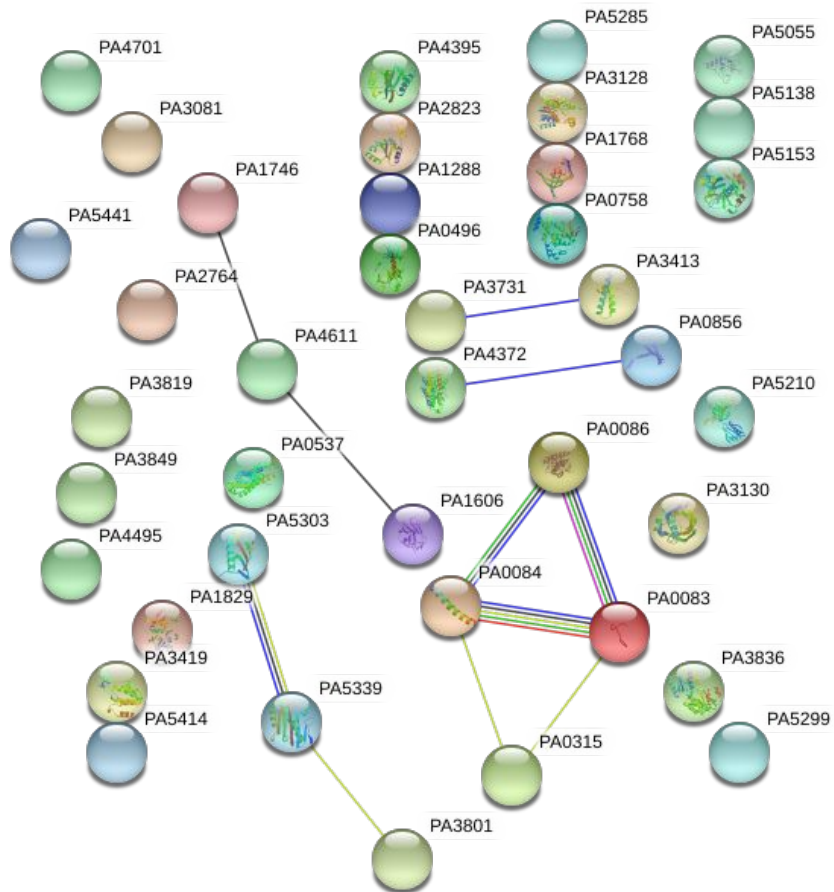

Figure S3. Interaction network of uncharacterized-functioned undetected and newly detected proteins after 3-HPAA exposure by STRING. Proteins are represented as nodes.

### Supporting Information 3

#### Validation of Undetection of 30S Ribosomal Protein S15 after 3-HPAA exposure by RT-qPCR

Bacterial cultures were prepared by the same protocol of protein isolation prior to total RNA isolation. The isolation of the total RNA from control 3-HPAA treated *P. aeruginosa* was performed by GeneJET RNA purification kit (#K0732 Thermo Scientific) according to the manufacturer's instructions (numbers of the washing steps were modified as two times with buffer 1 and three times for buffer 2). Total RNA samples were isolated from the 18 hour cultures of *P. aeruginosa* for being comparable to protein data. The samples were kept at -80°C until cDNA preparation. The cDNA preparation was performed according to the manufacturer's instructions of the kit (# K1622 Thermo RevertAid First Strand cDNA Synthesis Kit). The primers of RT-qPCR were designed for the genes of 30S ribosomal protein S15 (*rpsO*) and S12 (*rpsL*) by Primer BLAST programme in Refseq database among Pseudomonadales with maximum target size of 200 (Table S18). The housekeeping gene was determined as *rpsL* depending on the studies of Dumas et al. and Llanes et al. (Dumas et al., 2006; Llanes et al., 2004; see reference list). The PCR mixture was obtained by using the protocol of SYBR green kit (LightCycler 480 SYBR Green I Master Mix, Roche) with half of the recommended volume. The PCR was carried out in the following conditions: 5 minutes at 25°C; 60 minutes at 42°C and 5 minutes at 70°C. The cDNA concentration was 250 ng, melting temperature was 50°C and the annealing cycles were 40 during the PCR process. The produced cDNA samples were kept at -20°C until usage.

Table S18. The primers used in RT-qPCR.

| Genes       | F Primer             | R Primer             |
|-------------|----------------------|----------------------|
| <b>rpsL</b> | CGTACATCGGTGGTGAAGGT | CGACCCTGCTTACGGTCTTT |
| <b>rpsO</b> | TACAAGCAAGCTGAAGGCGA | CCATACGGATCAGACCACGG |

The relative fold change calculation of three biological samples and three technical repeats were performed with delta Ct method. The average fold change in Ct value of mRNA expression of *rpsO* gene was 0.8 ( $\pm 0.04$ ) after 3-HPAA exposure. The normalization was done based on the mRNA expression of housekeeping gene and untreated group (as 1.0 in fold change). These results showed that expression of *rpsO* gene decreased 1.3 fold. It is consistent

with the protein data, thus, 3-HPAA treatment resulted in a reduction in the 30S ribosomal protein S15 in *P. aeruginosa* (Figure S4).

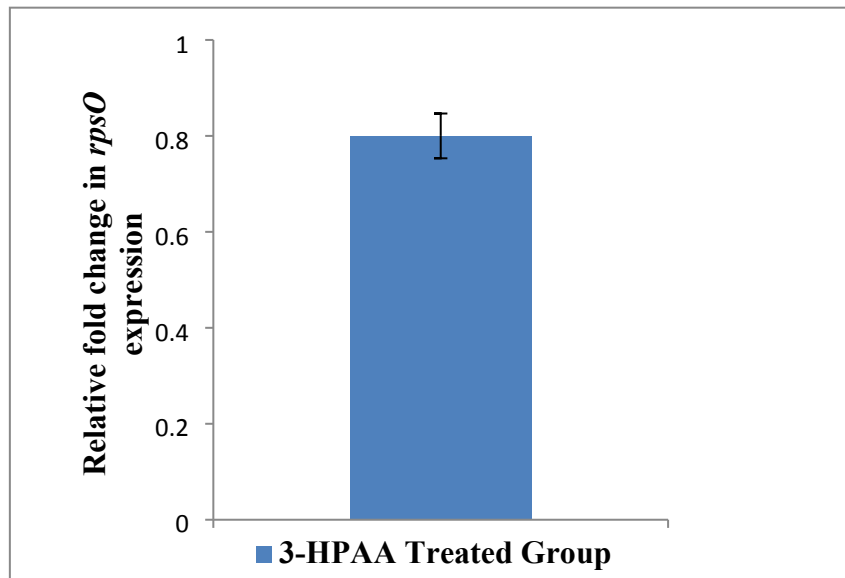

Figure S4. Relative fold change in the expression of *rpsO* gene. Delta Ct method was applied for three biological and three technical repeats. Normalization was performed based on *rpsL* gene expression and untreated group ( $p < 0.05$ ).

## Supporting Information 4

### The IDs of the Genes in the Categories of KEGG Pathway Enrichment Analysis

Table S19. Entrez gene IDs used in the KEGG pathway analysis via DAVID

| Detection State of the Protein | Category                                                | Entrez Gene ID                                                                                                                                                                                                                                                                                                                                                                                                                         |
|--------------------------------|---------------------------------------------------------|----------------------------------------------------------------------------------------------------------------------------------------------------------------------------------------------------------------------------------------------------------------------------------------------------------------------------------------------------------------------------------------------------------------------------------------|
| Undetected                     | Biosynthesis of siderophore group nonribosomal peptides | 880048, 881821, 880566, 881846                                                                                                                                                                                                                                                                                                                                                                                                         |
| Undetected                     | Metabolic Pathways                                      | 877749, 882904, 878291, 882585, 878748, 879406, 878259, 878603, 880534, 880477, 882952, 879172, 882699, 879231, 881680, 878523, 883049, 877840, 881821, 877877, 882812, 882498, 882262, 880316, 878596, 878162, 879802, 882212, 880890, 881513, 879394, 879012, 878446, 883103, 879350, 881934, 879918, 881182, 879056, 879865, 881166, 878828, 878134, 878236, 878275, 878687, 880940, 880542, 881423, 881196, 879525, 879047, 882484 |
| Undetected                     | Biosynthesis of antibiotics                             | 878523, 881821, 877749, 882904, 878291, 879406, 881846, 881934, 881182, 881423, 880534, 880477, 879991 878162 879525, 879047, 882699, 878236, 878134, 879805                                                                                                                                                                                                                                                                           |

|                   |                                                 |                                                                                                                                                                                                                                                                             |
|-------------------|-------------------------------------------------|-----------------------------------------------------------------------------------------------------------------------------------------------------------------------------------------------------------------------------------------------------------------------------|
| Undetected        | Glutathione Metabolism                          | 882952, 879865, 878570, 882262,<br>880278                                                                                                                                                                                                                                   |
| Newly<br>Detected |                                                 | 878956, 879732, 880792, 881338,<br>880066, 882903, 880992, 880552,<br>879312, 880413, 882347, 883043,<br>883061, 881249, 879594, 882647,<br>879557, 879002, 882700, 879081,<br>882930, 882931, 879244, 878267,<br>880901, 881495, 880490, 879046,<br>881759, 877856, 880584 |
|                   | Metabolic Pathways                              |                                                                                                                                                                                                                                                                             |
| Newly<br>Detected |                                                 | 880792, 879732, 879557, 880066,<br>882700, 879312, 879046, 882930,<br>881249, 882931                                                                                                                                                                                        |
|                   | Carbon metabolism                               |                                                                                                                                                                                                                                                                             |
| Newly<br>Detected |                                                 | 879732, 879557, 879312, 879046,<br>880413, 881249                                                                                                                                                                                                                           |
|                   | Pyruvate metabolism                             |                                                                                                                                                                                                                                                                             |
| Newly<br>Detected |                                                 | 880792, 879732, 880066, 882700                                                                                                                                                                                                                                              |
|                   | Methane metabolism                              |                                                                                                                                                                                                                                                                             |
| Newly<br>Detected |                                                 | 880792, 879732, 879557, 880066,<br>882700, 882903, 881495, 879312,<br>879046, 881759, 880413, 880584,<br>881249                                                                                                                                                             |
|                   | Microbial metabolism in<br>diverse environments |                                                                                                                                                                                                                                                                             |
